# Supplementary material
Source: HighWire-hosted journal article supplement (https://bmjopen.bmj.com/content/12/7/e056952)
Supplement: inline-supplementary-material-1 [file inline-supplementary-material-1.pdf]

## SUPPLEMENTARY MATERIAL

### Appendix A

#### *Section A: Baseline Characteristics*

1. Are you a healthcare worker currently involved in the management of COVID-19 treatment?
  - Yes
  - No
2. What is your position?
  - Doctor of Medicine or Doctor of Osteopathic Medicine
  - Physician Associate
  - Respiratory Therapist
  - Pharmacist
  - Resident
  - Bachelor of Science in Nursing
  - Nursing Assistant
  - Other:
3. What is your gender?
  - Male
  - Female
  - I do not want to say
  - Other:
4. Race
5. \_\_\_\_\_

6. Age
7. \_\_\_\_\_
8. What type of institution do you work for?
  - Private hospital
  - Public hospital
9. How many years of experience do you have in your field?
  - <5 years
  - 5-10 years
  - 10-20 years
  - >20 years
10. How many hours do you work per week?
  - Less than 40 hours
  - 40-80 hours
  - >80 hours

***Section B: Personal Protective Equipment Use***

11. What type of Personal Protective Equipment have you used? (Please check all that apply)
  - Surgical Mask or equivalent respirator
  - N95, type 2 (FFP2) self-filtering respirator or equivalent respirator
  - Type 3 (FFP3) self-filtering respirator.
  - Powered air-purifying respirator (PAPR)
  - Eye protection: Protective eyewear
  - Eye protection: Face shield

- Apron
- Long-sleeved waterproof gown
- Gloves
- Hat
- Other

12. Do you continue to take the necessary precautions during the COVID-19 pandemic?

- Never
- Almost never
- Occasionally / Sometimes
- Almost all the time
- All the time

***Section C: Burden of social pressure/bullying***

13. Answer each of the questions according to the following scale:

- Never
  - Almost never
  - Occasionally
  - Almost all the time
  - All the time
- a. Have you been witnessed bullying at your workplace for wearing the at protective equipment necessary during the pandemic?
- b. Have you felt pressure social pressure in your workplace for wearing the equipment at protective equipment necessary during the pandemic?

- c. Have you been bullied in the workplace for wearing the required personal protective equipment during the pandemic?
14. From whom have you received social pressure or been bullied inside or outside your workplace: Supervisors?
- Never
  - Almost never
  - Occasionally
  - Almost all the time
  - All the time
15. From whom have you received social pressure or been bullied inside or outside your workplace: Co-workers/colleagues coworkers/colleagues?
- Never
  - Almost never
  - Occasionally
  - Almost all the time
  - All the time
16. From whom have you received social pressure or been bullied inside or outside your workplace: Patients?
- Never
  - Almost never
  - Occasionally
  - Almost all the time
  - All the time

17. From whom have you received social pressure or been bullied inside or outside your workplace: Employees/visitors?

- Never
- Almost never
- Occasionally
- Almost all the time
- All the time

18. From whom have you received social pressure or been bullied inside or outside your workplace: Family members?

- Never
- Almost never
- Occasionally
- Almost all the time
- All the time

19. From whom have you received social pressure or been bullied inside or outside your workplace: Friends?

- Never
- Almost never
- Occasionally
- Almost all the time
- All the time

20. From whom have you received social pressure or been bullied inside or outside your workplace: Strangers?

- Never
- Almost never
- Occasionally
- Almost all the time
- All the time

***Section D: Contributors to social pressure/bullying***

21. To what extent does what gender of individuals being female make you feel social pressure/bullying?

- Never
- Almost never
- Occasionally
- Almost all the time
- All the time

22. To what extent does what gender of individuals being male make you feel social pressure/bullying?

- Never
- Almost never
- Occasionally
- Almost all the time
- All the time

23. Do you think social pressure/bullying is due to perceived power imbalance/abuse of power?

- Yes
- No
- I do not know

***Section E: Frequency and Perceptions towards social pressure/bullying***

24. Which of the following types of bullying have you witnessed while using personal protective personal protective equipment at your workplace?

- Verbal bullying
- Physical bullying
- Social bullying
- Cyberbullying
- Others

25. To what extent do you feel concerned about social pressure/bullying for using personal protective equipment in your workplace?

- Not worried at all
- Somewhat concerned
- Somewhat concerned
- Moderately concerned
- Extremely concerned

26. Do you agree that the social pressure/bullying was intentional?

- Strongly disagree
- Disagree
- Neither agree nor disagree

- Agree
- Strongly agree

27. How concerned are you about social pressure/bullying due to the use of personal protective equipment?

- Not worried at all
- Somewhat concerned
- Somewhat concerned
- Moderately concerned
- Extremely concerned

28. How often do you feel you are a victim of such social pressure/bullying due to the use of personal protective equipment?

- Daily
- Weekly
- Monthly
- Never

29. How long have these episodes lasted?

- Less than one minute
- Few minutes
- Days
- Weeks

***Section F: Attitudes and Job Satisfaction***

30. How do you cope with social pressure/bullying?



- Avoiding social gatherings
- Avoiding social networks
- Avoiding other colleagues
- Seeking professional help
- I don't know
- Not paying attention to comments
- Other

31. Have you been infected with COVID-19?

- Yes
- No

32. Do you think that social pressure/bullying was a contributing factor to your reduced use of personal protective reduced use of personal protective equipment on your part?

- Yes
- No
- I do not know

33. Who provided you with the personal protective equipment during the pandemic of the COVID-19 PANDEMIC?

- Institution
- Donation
- For own account
- Other

34. Do you think your institution prioritized your mental and physical well-being during the COVID-19 pandemic?

- Strongly disagree
- Disagree
- Neither agree nor disagree
- Agree
- Strongly agree

35. How does your institution support you? You can choose from multiple options

- Provided the supply of personal protective equipment.
- Provided IPC training
- Provided COVID-19 specific training.
- Psychosocial support
- Incentives
- None of the above
- Other

36. Do you feel that your institution assumes responsibility for providing you with adequate personal protective equipment when you care for patients with COVID-19?

- Strongly disagree
- Disagree
- Neither agree nor disagree
- Agree
- Strongly agree

37. Have you considered quitting your current job due to social pressure/bullying during the COVID-19 pandemic?

- Yes

- No

38. Have you sought other employment due to social pressure/bullying during the COVID-19 pandemic?

- Yes
- No

39. Have you noticed members of the community outside your place of work bullying you because you wear personal protective equipment?

- Yes
- No

40. How would you currently rate your overall job satisfaction as a health care worker?

- Very dissatisfied
- Dissatisfied
- Not sure
- Satisfied
- Very satisfied
